# Supplementary material for: Colorimetric sensor array with unmodified noble metal nanoparticles for naked-eye detection of proteins and bacteria
Source: Royal Society of Chemistry journal article supplement (doi:10.1039/c5an01267h), 2015-01-01
Supplement: c5an01267h1.pdf [file c5an01267h1.pdf]

## Supporting Information

# Colorimetric sensor array with unmodified noble metal nanoparticles for naked-eye detection of proteins and bacteria

Dongyang Li,<sup>a</sup> Yanhua Dong,<sup>a</sup> Binyu Li,<sup>a</sup> Yayan Wu,<sup>\*a</sup> Kai Wang,<sup>a</sup> Sichun Zhang<sup>\*b</sup>

*School of Life Science and Technology, Key Laboratory of Biomedical Information Engineering of Ministry of Education, Xi'an Jiaotong University, 710049, Xi'an, P. R. China, and Department of Chemistry, Key Laboratory for Atomic and Molecular Nanosciences of the Education Ministry, Tsinghua University, 100084, Beijing, P. R. China*

### Synthesis of AuNPs and AgNPs

AuNPs of different sizes were prepared according to a previously reported protocol. Briefly, 100 mL of 0.01% HAuCl<sub>4</sub> solution in 250 mL flask was put into a water bath. When the solution was heated to its boiling point, a certain volume of 1% sodium citrate was added into it under vigorous stirring. After 30 min of boiling incubation, the solution was cooled down to the room temperature. As we known, different volumes of sodium citrate lead to different size of AuNPs. In this experiment, we added 3 mL, 1.5 mL, 1 mL, 0.85 mL and 0.7 mL of 1% sodium citrate respectively to produce five different gold nanoparticles with diameters of 10-60nm (NP1-NP5). As for silver nanoparticles, it was also prepared based on the literatures described before. In brief, ammonia water was added to 1 mL of 0.1mol/L AgNO<sub>3</sub> dropwise until the precipitate disappeared. The solution was then diluted to 10 mL with ultrapure water and the final solution was 0.01 mol/L Tollens' reagent. Then 2 mL 0.05mol/L glucose and 0.5 g β-cyclodextrin were mixed together. Subsequently, 1.0 mL and 0.9 mL Tollens' reagent were added into the mixture, respectively and diluted to 50 mL with ultrapure water. After the mixture was heated to its boiling point under rapid stirring for 20 min and cooled down to room temperature, two types of AgNPs were obtained. The absorbance spectrum of synthesized nanoparticles are illustrate in Figure S1. The sizes and shapes of synthesized nanoparticles were characterized using transmission electron microscopy (TEM) at 200kV. The diameters of gold and silver nanoparticles are 13nm, 25nm, 35nm, 50nm, 60nm, 25nm, and 31nm, respectively (Figure S2).

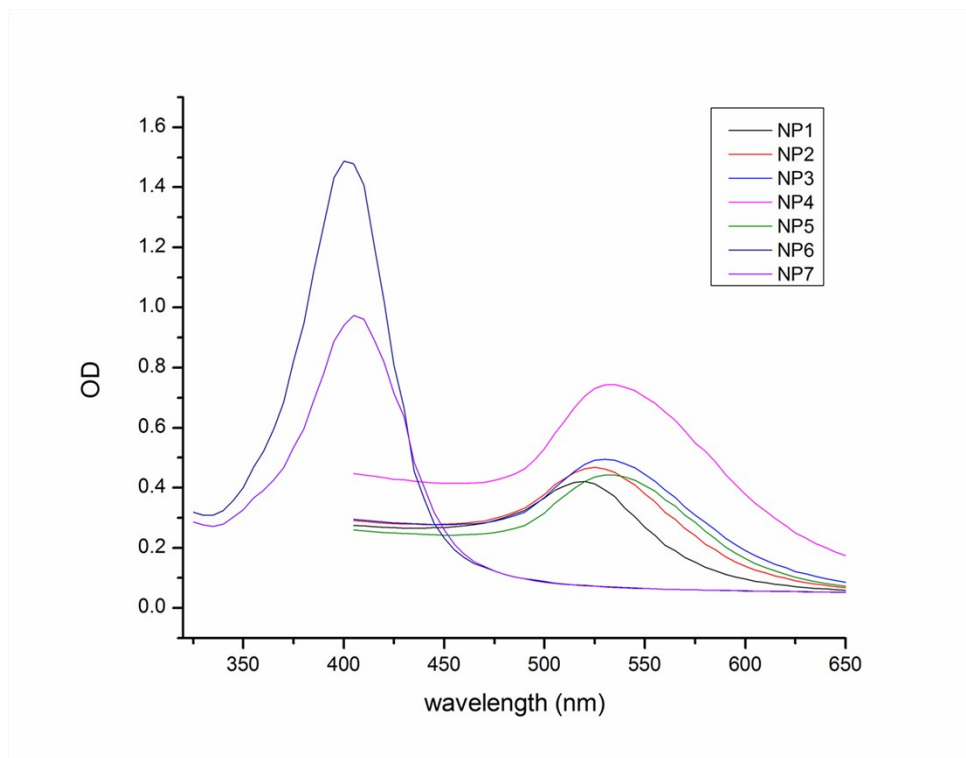

**Figure S1** The absorbance spectrum of the synthesized gold and silver nanoparticles.

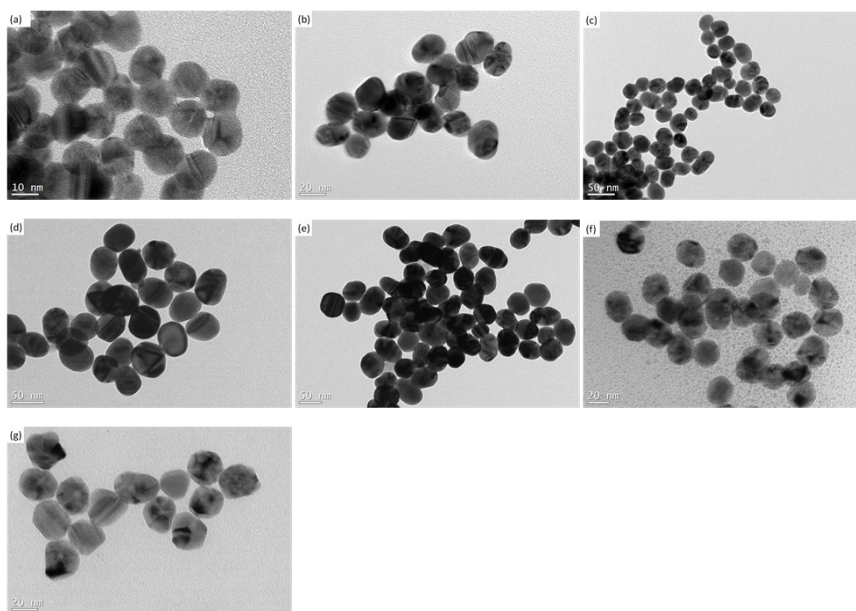

**Figure S2** Transmission Electron Microscopy image of gold and silver nanoparticles.

(a)-(e): AuNPs nanoparticles of five different sizes; (f)-(g): AgNPs nanoparticles of two different sizes.

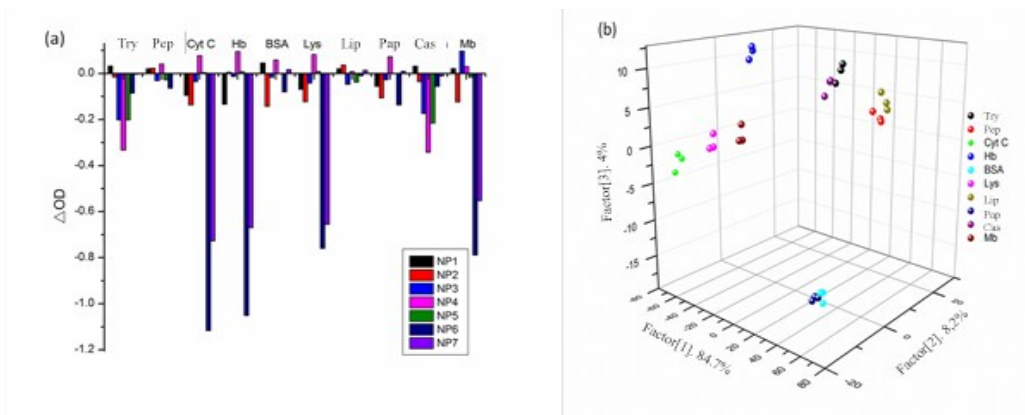

**Figure S3.** Protein identification with the colorimetric sensor array. (a) Absorbance response patterns of seven noble nanoparticles against ten proteins (all at 0.5  $\mu M$ ): trypsin (Try), pepsin (Pep), cytochrome C(Cyt C), hemoglobin (Hb), bovine serum albumin (BSA), lysozyme (Lys), lipase (Lip), papain (Pap), casein (Cas) and myoglobin (Mb). (b) Canonical score plot for the noble nanoparticles-based sensor array. All the proteins were clearly identified except for a little overlap of Pap and BSA.

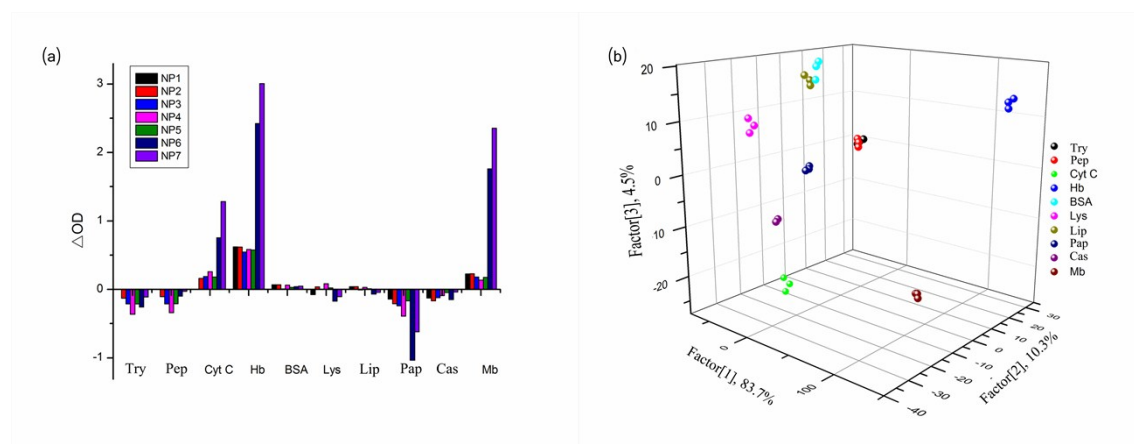

**Figure S4.** Protein identification with the colorimetric sensor array. (a) Absorbance response patterns of seven noble nanoparticles against ten proteins (all at 50  $\mu M$ ): trypsin (Try), pepsin (Pep), cytochrome C(Cyt C), hemoglobin (Hb), bovine serum albumin (BSA), lysozyme (Lys), lipase (Lip), papain (Pap), casein (Cas) and myoglobin (Mb). (b) Canonical score plot for the noble nanoparticles-based sensor array. All the proteins were clearly identified except for overlap of Pep and Try.

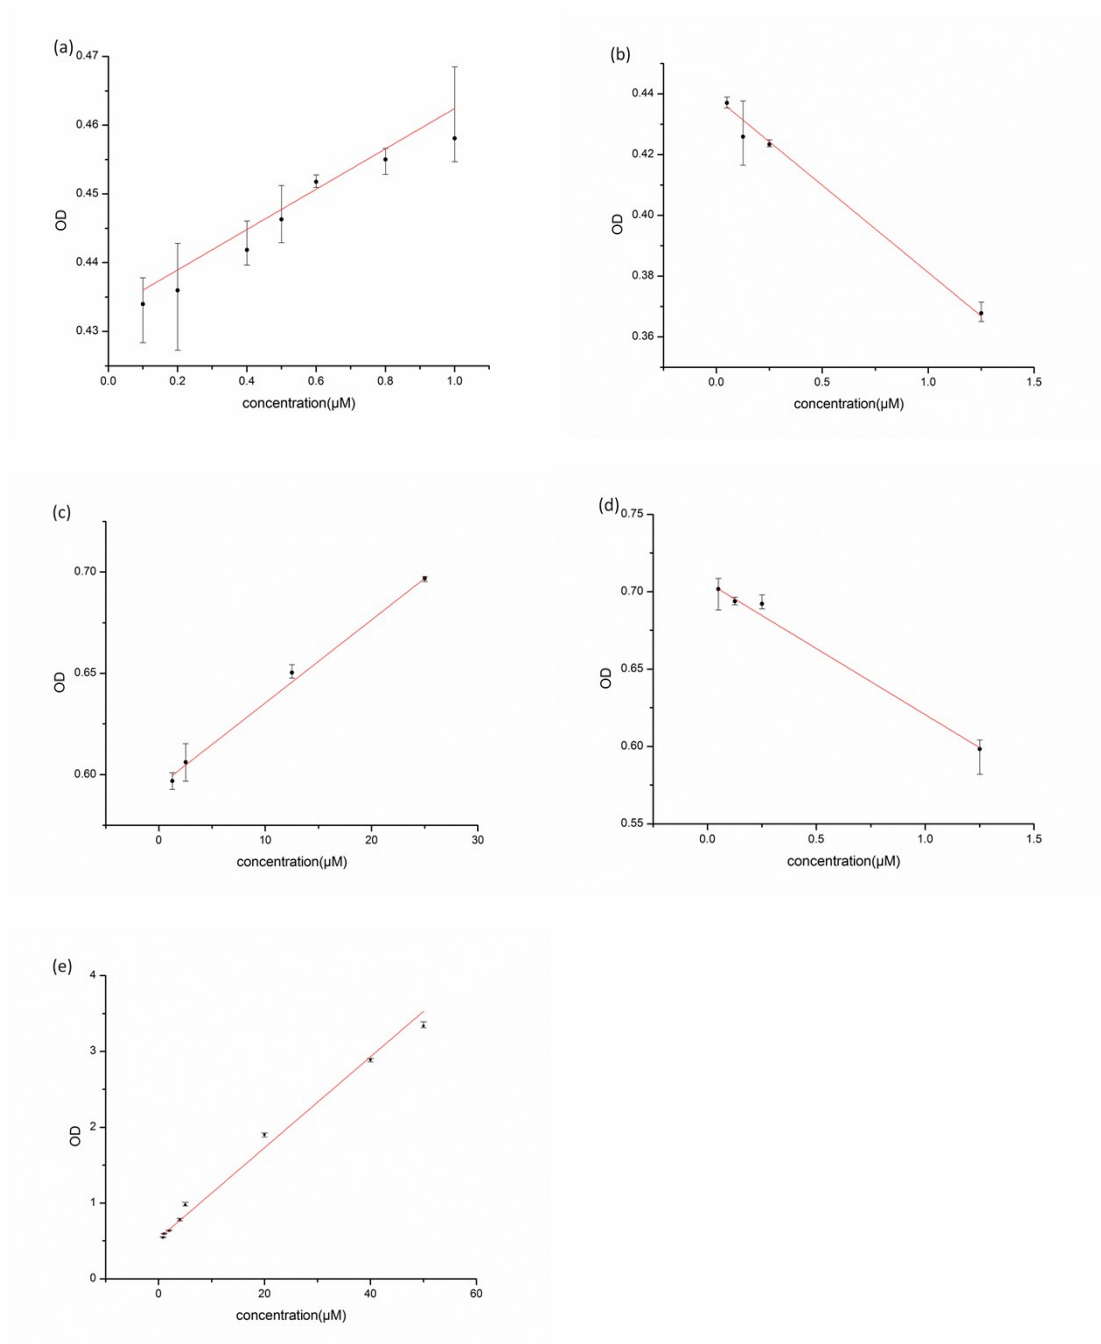

**Figure S5.** Quantitative analysis of proteins. (a) Linear response of Try on NP1. (b) Linear response of Pap on NP1. (c) Linear response of Cyt C on NP3. (d) Linear response of Pep on NP4. (e) Linear response of Mb on NP7.

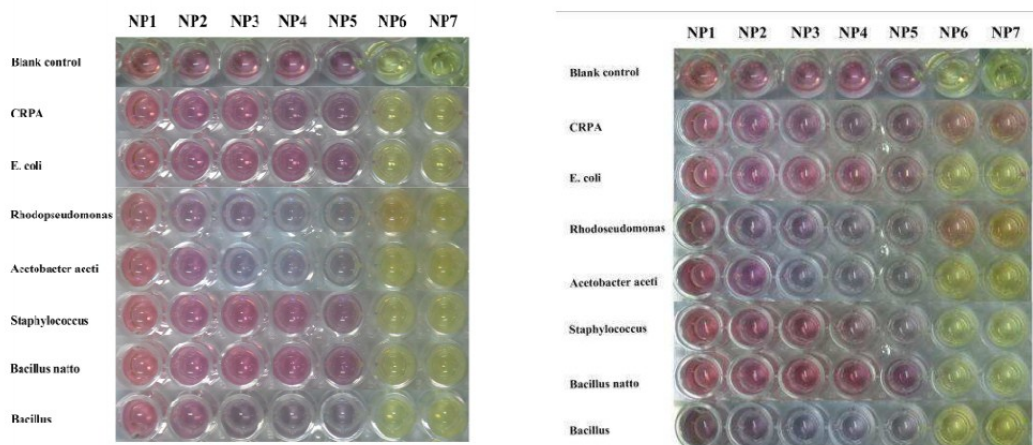

**Figure S6.** The color change patterns of noble nanoparticles against different bacteria After 20mins (Left); After 6 hours (Right)

NP1: 15 nm AuNPs; NP2: 25 nm AuNPs; NP3: 35 nm AuNPs; NP4: 50 nm AuNPs; NP5: 60 nm AuNPs; NP6: 25nm AgNPs; NP7: 31nm AgNPs

**Table S1.** Absorbance response patterns of different proteins (all at 0.5  $\mu$ M) against noble metal nanoparticle-based sensor array (NP1-NP7).

| Protein | NP1     | NP2     | NP3     | NP4     | NP5     | NP6     | NP7     |
|---------|---------|---------|---------|---------|---------|---------|---------|
| Try     | 0.0343  | -0.0239 | -0.1999 | -0.3306 | -0.1985 | -0.0919 | -0.0051 |
| Try     | 0.0307  | -0.0077 | -0.2028 | -0.3343 | -0.2065 | -0.0938 | 0.0022  |
| Tryn    | 0.0335  | -0.0143 | -0.2012 | -0.334  | -0.2006 | -0.0726 | -0.0035 |
| Pep     | 0.0207  | 0.0205  | -0.0373 | 0.038   | -0.0328 | -0.1073 | -0.0257 |
| Pep     | 0.0171  | 0.0281  | -0.023  | 0.0478  | -0.0276 | -0.0932 | 0.0141  |
| Pep     | 0.0235  | 0.0197  | -0.0329 | 0.0377  | -0.0227 | 0.0081  | 0.014   |
| Cyt C   | -0.0948 | -0.1342 | -0.0341 | 0.0878  | -0.0062 | -1.1183 | -0.7298 |
| Cyt C   | -0.0959 | -0.1322 | -0.0226 | 0.0738  | 0.008   | -1.1185 | -0.7278 |
| Cyt C   | -0.0968 | -0.1437 | -0.0491 | 0.069   | 0.0111  | -1.1136 | -0.7255 |
| Hb      | -0.1308 | 0.0061  | -0.0139 | 0.0971  | 0.0109  | -1.0529 | -0.6717 |
| Hb      | -0.1379 | 0.0001  | -0.0066 | 0.092   | 0.0127  | -1.0494 | -0.6711 |
| Hb      | -0.1322 | 0.0079  | -0.0206 | 0.0954  | -0.0009 | -1.0504 | -0.6645 |
| BSA     | 0.0468  | -0.1419 | -0.0134 | 0.0397  | 0.0004  | -0.0955 | 0.0043  |
| BSA     | 0.0453  | -0.1373 | -0.011  | 0.0372  | -0.0022 | -0.1097 | 0.0175  |
| BSA     | 0.0448  | -0.1472 | -0.0246 | 0.101   | 0.0021  | -0.0337 | 0.0289  |
| Lys     | -0.0694 | -0.1186 | -0.0459 | 0.0853  | -0.0016 | -0.7282 | -0.6551 |
| Lys     | -0.0679 | -0.1244 | -0.041  | 0.0809  | 0.0148  | -0.7573 | -0.6531 |
| Lys     | -0.0708 | -0.1257 | -0.0402 | 0.0792  | 0.0117  | -0.7912 | -0.6591 |
| Lip     | 0.0215  | 0.0348  | -0.0323 | 0.0049  | -0.0301 | 0.0036  | 0.0295  |
| Lip     | 0.0198  | 0.0382  | -0.056  | 0.0373  | -0.037  | -0.0002 | 0.023   |
| Lip     | 0.0203  | 0.0376  | -0.055  | -0.0153 | -0.0439 | -0.0351 | -0.0104 |
| Pap     | -0.056  | -0.1114 | -0.034  | 0.0764  | -0.0027 | -0.1199 | 0.0045  |

|     |         |         |         |         |         |         |         |
|-----|---------|---------|---------|---------|---------|---------|---------|
| Pap | -0.0553 | -0.101  | -0.0211 | 0.0764  | 0.0001  | -0.1711 | 0.0227  |
| Pap | -0.0574 | -0.1065 | -0.0262 | 0.0675  | 0.0043  | -0.1186 | 0.0016  |
| Cas | 0.032   | -0.0294 | -0.2141 | -0.345  | -0.2147 | -0.0558 | -0.0041 |
| Cas | 0.0291  | -0.0322 | -0.1574 | -0.3411 | -0.2153 | -0.0417 | -0.0167 |
| Cas | 0.0319  | -0.0427 | -0.1508 | -0.342  | -0.2168 | -0.0692 | -0.0122 |
| Mb  | 0.0369  | -0.1309 | 0.104   | 0.0295  | -0.0091 | -0.7824 | -0.5501 |
| Mb  | 0.0192  | -0.1161 | 0.0935  | -0.0077 | -0.0179 | -0.7894 | -0.5627 |
| Mb  | 0.0091  | -0.1231 | 0.0939  | 0.0679  | -0.0202 | -0.795  | -0.5462 |

Table S2. Absorbance response patterns of different proteins (all at 5  $\mu$ M) against noble metal nanoparticle-based sensor array (NP1-NP7).

| Protein | NP1     | NP2     | NP3     | NP4     | NP5     | NP6     | NP7     |
|---------|---------|---------|---------|---------|---------|---------|---------|
| Try     | -0.0333 | -0.142  | -0.2098 | -0.3567 | -0.2113 | -1.1042 | -0.2999 |
| Try     | -0.0335 | -0.1426 | -0.2128 | -0.3565 | -0.2082 | -1.1021 | -0.3613 |
| Try     | -0.02   | -0.1441 | -0.2113 | -0.3543 | -0.2146 | -1.1032 | -0.3445 |
| Pep     | 0.0335  | -0.1281 | -0.2138 | -0.3392 | -0.2136 | -0.0161 | -0.0277 |
| Pep     | 0.0376  | -0.1286 | -0.2163 | -0.3618 | -0.2133 | -0.003  | -0.0108 |
| Pep     | 0.0347  | -0.1275 | -0.2064 | -0.2893 | -0.2183 | 0.0068  | -0.0224 |
| Cyt C   | -0.1034 | -0.1126 | 0.0004  | 0.1105  | 0.029   | -0.8916 | -0.5765 |
| Cyt C   | -0.0997 | -0.1089 | 0.0088  | 0.1049  | 0.0266  | -0.8587 | -0.5483 |
| Cyt C   | -0.1024 | -0.0992 | 0.0064  | 0.1036  | 0.0292  | -0.9237 | -0.5391 |
| Hb      | 0.043   | 0.1069  | 0.0318  | 0.1089  | 0.0593  | -0.448  | 0.0244  |
| Hb      | 0.0532  | 0.1067  | 0.0286  | 0.1366  | 0.0552  | -0.395  | 0.0617  |
| Hb      | 0.0416  | 0.1112  | 0.0329  | 0.1233  | 0.0518  | -0.4086 | 0.0672  |
| BSA     | 0.0581  | 0.0475  | -0.0321 | 0.0726  | 0.0088  | -0.0758 | -0.0155 |
| BSA     | 0.0594  | 0.0477  | -0.0214 | 0.0738  | 0.0006  | -0.0343 | 0.0023  |
| BSA     | 0.0581  | 0.0544  | -0.0538 | 0.0814  | 0.0043  | -0.0423 | -0.0232 |
| Lys     | -0.0739 | -0.0876 | -0.0098 | 0.0938  | 0.0131  | -0.1282 | -0.0435 |
| Lys     | -0.0715 | -0.0838 | -0.0077 | 0.0955  | 0.0162  | -0.1741 | -0.0452 |
| Lys     | -0.0722 | -0.0785 | -0.0048 | 0.0906  | 0.0156  | -0.1369 | -0.0625 |
| Lip     | 0.0282  | 0.0442  | -0.0783 | -0.1465 | -0.0446 | -0.025  | -0.0108 |
| Lip     | 0.0361  | 0.0345  | -0.07   | -0.1359 | -0.0512 | -0.0308 | -0.0163 |
| Lip     | 0.0278  | 0.0412  | -0.0766 | -0.135  | -0.0706 | -0.0323 | -0.0516 |
| Pap     | -0.0663 | -0.0972 | -0.044  | 0.0823  | 0.0009  | -0.9369 | -0.5682 |
| Pap     | -0.074  | -0.0997 | -0.036  | 0.0818  | 0.0095  | -0.8809 | -0.5663 |
| Pap     | -0.0752 | -0.0997 | -0.0255 | 0.0879  | 0.0111  | -0.9327 | -0.568  |
| Cas     | 0.0169  | -0.0647 | -0.0857 | -0.1267 | -0.0782 | -0.1125 | -0.0848 |
| Cas     | 0.0223  | -0.062  | -0.0877 | -0.1319 | -0.072  | -0.089  | -0.0577 |
| Cas     | 0.0198  | -0.0612 | -0.0836 | -0.1274 | -0.131  | -0.1604 | -0.0772 |
| Mb      | 0.0343  | -0.0743 | -0.0027 | 0.1031  | 0.0228  | -0.2226 | -0.2116 |
| Mb      | 0.0338  | -0.0704 | -0.0199 | 0.0866  | 0.0164  | -0.2818 | -0.1861 |
| Mb      | 0.0343  | -0.0749 | -0.015  | 0.0822  | 0.0221  | -0.2275 | -0.184  |

Table S3. Absorbance response patterns of different proteins (all at 50  $\mu$ M) against noble metal nanoparticle-based sensor array (NP1-NP7).

| Protein | NP1     | NP2     | NP3     | NP4     | NP5     | NP6     | NP7     |
|---------|---------|---------|---------|---------|---------|---------|---------|
| Try     | -0.0013 | -0.1274 | -0.2205 | -0.3715 | -0.2109 | -0.2468 | -0.1136 |
| Try     | 0.0023  | -0.1337 | -0.2072 | -0.3496 | -0.217  | -0.24   | -0.1029 |
| Try     | 0.0123  | -0.1292 | -0.2111 | -0.3677 | -0.2039 | -0.2858 | -0.1102 |
| Pep     | 0.0019  | -0.1082 | -0.2085 | -0.3431 | -0.2072 | -0.0914 | -0.0073 |
| Pep     | 0.0035  | -0.1056 | -0.2123 | -0.3383 | -0.2054 | -0.0964 | -0.0215 |
| Pep     | 0.0045  | -0.1071 | -0.2112 | -0.3363 | -0.2115 | -0.108  | -0.048  |
| Cyt C   | 0.0025  | 0.1556  | 0.1878  | 0.2506  | 0.1842  | 0.6808  | 1.2014  |
| Cyt C   | 0.0092  | 0.1593  | 0.1829  | 0.2598  | 0.1667  | 0.7857  | 1.3022  |
| Cyt C   | 0.0001  | 0.1752  | 0.1885  | 0.2663  | 0.1925  | 0.7948  | 1.3398  |
| Hb      | 0.6028  | 0.6033  | 0.5036  | 0.5777  | 0.5708  | 2.5411  | 3.0077  |
| Hb      | 0.6393  | 0.6225  | 0.5631  | 0.5845  | 0.5884  | 2.5224  | 3.0077  |
| Hb      | 0.6254  | 0.6257  | 0.5706  | 0.5966  | 0.5766  | 2.3208  | 2.9769  |
| BSA     | 0.0672  | 0.0556  | 0.0204  | 0.0684  | 0.0324  | 0.0039  | 0.0656  |
| BSA     | 0.0729  | 0.0788  | 0.0033  | 0.068   | 0.0281  | 0.0515  | 0.0524  |
| BSA     | 0.0653  | 0.066   | -0.0026 | 0.0543  | 0.0306  | 0.0722  | 0.0288  |
| Lys     | -0.0714 | 0.0426  | 0.0035  | 0.0854  | 0.022   | -0.1693 | -0.1413 |
| Lys     | -0.0701 | 0.0371  | -0.005  | 0.0821  | 0.0195  | -0.175  | -0.0926 |
| Lys     | -0.0808 | 0.0371  | -0.0048 | 0.0767  | 0.0196  | -0.1617 | -0.0865 |
| Lip     | 0.0359  | 0.0432  | -0.0087 | 0.0396  | 0.0119  | -0.0591 | -0.0723 |
| Lip     | 0.0412  | 0.0419  | -0.0052 | 0.0236  | 0.0122  | -0.0595 | -0.0154 |
| Lip     | 0.0423  | 0.0436  | -0.0063 | 0.0312  | 0.0083  | -0.0817 | -0.0346 |
| Pap     | -0.1398 | -0.208  | -0.2372 | -0.3908 | -0.1692 | -1.0413 | -0.6096 |
| Pap     | -0.1373 | -0.2107 | -0.239  | -0.3857 | -0.1678 | -1.0333 | -0.6207 |
| Pap     | -0.1468 | -0.2104 | -0.2371 | -0.3928 | -0.1651 | -1.0262 | -0.6289 |
| Cas     | -0.1237 | -0.1646 | -0.1182 | -0.0881 | -0.0426 | -0.146  | -0.0359 |
| Cas     | -0.1282 | -0.1646 | -0.1263 | -0.0913 | -0.044  | -0.16   | -0.0384 |
| Cas     | -0.1258 | -0.1705 | -0.1144 | -0.0904 | -0.0485 | -0.1343 | -0.0429 |
| Mb      | 0.223   | 0.221   | 0.1713  | 0.1445  | 0.1742  | 1.7407  | 2.3463  |
| Mb      | 0.225   | 0.233   | 0.187   | 0.1506  | 0.1861  | 1.7374  | 2.3471  |
| Mb      | 0.2273  | 0.2329  | 0.189   | 0.106   | 0.165   | 1.8096  | 2.3664  |

Table S4. Absorbance responses of different bacteria against noble metal nanoparticle-based sensor array (NP1-NP7).

| Bacteria | NP1     | NP2     | NP3     | NP4     | NP5     | NP6    | NP7    |
|----------|---------|---------|---------|---------|---------|--------|--------|
| E. coli  | 0.03425 | 0.03395 | 0.03015 | 0.03475 | 0.02555 | 0.0564 | 0.0661 |
| E. coli  | 0.05055 | 0.03765 | 0.03845 | 0.03265 | 0.02245 | 0.0744 | 0.0592 |
| E. coli  | 0.05275 | 0.04075 | 0.03675 | 0.03675 | 0.02195 | 0.0571 | 0.0582 |
| E. coli  | 0.04915 | 0.04095 | 0.04055 | 0.03725 | 0.03745 | 0.0528 | 0.067  |

|                   |         |         |         |          |          |         |        |
|-------------------|---------|---------|---------|----------|----------|---------|--------|
| E. coli           | 0.05045 | 0.04275 | 0.04105 | 0.03365  | 0.03335  | 0.052   | 0.0576 |
| E. coli           | 0.04895 | 0.03665 | 0.04185 | 0.03465  | 0.03225  | 0.0406  | 0.055  |
| CRPA              | 0.06175 | 0.06095 | 0.06765 | 0.06035  | 0.05835  | 0.0612  | 0.0565 |
| CRPA              | 0.06485 | 0.06105 | 0.06475 | 0.05385  | 0.05485  | 0.0659  | 0.0595 |
| CRPA              | 0.06745 | 0.06125 | 0.06725 | 0.05525  | 0.04495  | 0.0556  | 0.054  |
| CRPA              | 0.06235 | 0.05975 | 0.06625 | 0.05955  | 0.05155  | 0.0614  | 0.0717 |
| CRPA              | 0.06655 | 0.06105 | 0.06545 | 0.05305  | 0.04435  | 0.0616  | 0.0515 |
| CRPA              | 0.06275 | 0.06245 | 0.06765 | 0.05045  | 0.04515  | 0.0579  | 0.0566 |
| Acetobacter aceti | 0.11845 | 0.11455 | 0.03305 | -0.04585 | -0.04595 | 0.0411  | 0.0647 |
| Acetobacter aceti | 0.12045 | 0.12055 | 0.02145 | -0.04965 | -0.06935 | 0.0448  | 0.0765 |
| Acetobacter aceti | 0.13035 | 0.12445 | 0.02245 | -0.04575 | -0.06945 | 0.0579  | 0.0599 |
| Acetobacter aceti | 0.12805 | 0.12335 | 0.02775 | -0.04465 | -0.07135 | 0.0512  | 0.048  |
| Acetobacter aceti | 0.12305 | 0.11945 | 0.03315 | -0.04215 | -0.05885 | 0.0634  | 0.0402 |
| Acetobacter aceti | 0.12595 | 0.11255 | 0.03365 | -0.03555 | -0.06655 | 0.0517  | 0.0566 |
| Rhodopseudomonas  | 0.05955 | 0.04715 | 0.03635 | -0.09775 | -0.12865 | -0.0265 | 0.0833 |
| Rhodopseudomonas  | 0.03765 | 0.04815 | 0.02945 | -0.09515 | -0.13305 | -0.003  | 0.077  |
| Rhodopseudomonas  | 0.05595 | 0.04345 | 0.03035 | -0.09615 | -0.13275 | -0.014  | 0.0722 |
| Rhodopseudomonas  | 0.04575 | 0.04105 | 0.03855 | -0.09725 | -0.13445 | -0.0446 | 0.0723 |
| Rhodopseudomonas  | 0.04415 | 0.03565 | 0.04475 | -0.08715 | -0.13125 | -0.05   | 0.059  |
| Rhodopseudomonas  | 0.04585 | 0.03125 | 0.01965 | -0.13655 | -0.17515 | -0.0023 | 0.0604 |
| Bacillus natto    | 0.08165 | 0.06675 | 0.11835 | 0.06575  | 0.06645  | 0.0623  | 0.0783 |
| Bacillus natto    | 0.07655 | 0.06705 | 0.13205 | 0.06845  | 0.07555  | 0.0537  | 0.0863 |
| Bacillus natto    | 0.07705 | 0.06745 | 0.13555 | 0.06665  | 0.07535  | 0.0512  | 0.0909 |
| Bacillus natto    | 0.08175 | 0.07005 | 0.13105 | 0.07045  | 0.07555  | 0.054   | 0.0746 |
| Bacillus natto    | 0.04415 | 0.06855 | 0.12635 | 0.06775  | 0.07215  | 0.0501  | 0.0919 |
| Bacillus natto    | 0.07785 | 0.06745 | 0.13005 | 0.06635  | 0.06995  | 0.0495  | 0.0812 |
| Staphylococcus    | 0.06825 | 0.05815 | 0.10885 | 0.02835  | 0.00355  | 0.0419  | 0.0657 |
| Staphylococcus    | 0.06515 | 0.05665 | 0.10815 | 0.02735  | -0.00205 | 0.0468  | 0.0651 |
| Staphylococcus    | 0.06535 | 0.05525 | 0.10835 | 0.01155  | -0.04865 | 0.0348  | 0.059  |
| Staphylococcus    | 0.06185 | 0.05585 | 0.10585 | 0.02195  | -0.07035 | 0.0434  | 0.0535 |
| Staphylococcus    | 0.06305 | 0.05675 | 0.09135 | 0.01965  | -0.01065 | 0.0448  | 0.055  |
| Staphylococcus    | 0.06055 | 0.05515 | 0.09875 | 0.01645  | -0.05395 | 0.0298  | 0.0466 |
| Bacillus          | 0.09105 | 0.07675 | 0.04755 | -0.05115 | -0.07015 | 0.0948  | 0.1101 |
| Bacillus          | 0.09785 | 0.07465 | 0.04355 | -0.05055 | -0.05765 | 0.0923  | 0.1062 |
| Bacillus          | 0.08915 | 0.07345 | 0.04185 | -0.06195 | -0.07585 | 0.0905  | 0.1071 |
| Bacillus          | 0.09035 | 0.07095 | 0.04575 | -0.05755 | -0.08405 | 0.0932  | 0.1061 |
| Bacillus          | 0.08325 | 0.07415 | 0.04475 | -0.04235 | -0.06785 | 0.0844  | 0.1015 |
| Bacillus          | 0.08105 | 0.06875 | 0.06075 | -0.03365 | -0.06015 | 0.0823  | 0.1141 |

Table S5. Absorbance response patterns of different cancer cells against noble metal nanoparticle-based sensor array (NP1-NP7).

| Cancer cells                  | NP1    | NP2    | NP3    | NP4     | NP5    | NP6    | NP7    |
|-------------------------------|--------|--------|--------|---------|--------|--------|--------|
| Oral squamous carcinoma cells | 0.2597 | 0.2610 | 0.2520 | -0.0180 | 0.0014 | 0.7110 | 0.4842 |



|                               |        |        |        |         |         |        |        |
|-------------------------------|--------|--------|--------|---------|---------|--------|--------|
| Oral squamous carcinoma cells | 0.2637 | 0.2664 | 0.2509 | -0.0104 | 0.0013  | 0.7143 | 0.4808 |
| Oral squamous carcinoma cells | 0.2612 | 0.2655 | 0.2575 | -0.0185 | 0.0018  | 0.6732 | 0.4824 |
| Oral squamous carcinoma cells | 0.2587 | 0.2577 | 0.2552 | -0.0106 | 0.0000  | 0.6614 | 0.4990 |
| Oral squamous carcinoma cells | 0.2636 | 0.2591 | 0.2411 | -0.0061 | 0.0017  | 0.6694 | 0.4872 |
| Oral squamous carcinoma cells | 0.2768 | 0.2471 | 0.2679 | -0.0076 | 0.0017  | 0.7287 | 0.4825 |
| HeLa cells                    | 0.2736 | 0.2545 | 0.1604 | -0.0066 | 0.0095  | 0.6644 | 0.4403 |
| HeLa cells                    | 0.2835 | 0.2473 | 0.1809 | -0.0017 | 0.0084  | 0.6744 | 0.4699 |
| HeLa cells                    | 0.2563 | 0.2501 | 0.1518 | 0.0018  | -0.0002 | 0.6785 | 0.4473 |
| HeLa cells                    | 0.2611 | 0.2475 | 0.1421 | -0.0012 | -0.0007 | 0.6389 | 0.4310 |
| HeLa cells                    | 0.2610 | 0.2485 | 0.1574 | 0.0006  | 0.0074  | 0.6595 | 0.4268 |
| HeLa cells                    | 0.2531 | 0.2621 | 0.1369 | -0.0050 | 0.0020  | 0.6585 | 0.4060 |
| PC3 cells                     | 0.2298 | 0.1973 | 0.1330 | -0.0063 | 0.0052  | 0.6963 | 0.5245 |
| PC3 cells                     | 0.2468 | 0.1960 | 0.1462 | 0.0195  | 0.0036  | 0.6939 | 0.5451 |
| PC3 cells                     | 0.2334 | 0.2041 | 0.1681 | 0.0109  | 0.0118  | 0.7195 | 0.5207 |
| PC3 cells                     | 0.2376 | 0.2150 | 0.1831 | 0.0238  | 0.0075  | 0.7233 | 0.5544 |
| PC3 cells                     | 0.2505 | 0.2126 | 0.2008 | 0.0103  | 0.0057  | 0.7242 | 0.5408 |
| PC3 cells                     | 0.2342 | 0.2011 | 0.1940 | 0.0162  | 0.0024  | 0.7040 | 0.5183 |
| A549                          | 0.2435 | 0.2266 | 0.2781 | 0.0159  | 0.0164  | 0.6641 | 0.5361 |
| A549                          | 0.2405 | 0.2145 | 0.2677 | 0.0144  | 0.0089  | 0.6773 | 0.5067 |
| A549                          | 0.2418 | 0.2064 | 0.2620 | 0.0279  | 0.0051  | 0.7117 | 0.5186 |
| A549                          | 0.2403 | 0.2141 | 0.2723 | 0.0162  | 0.0059  | 0.7262 | 0.5081 |
| A549                          | 0.2430 | 0.1971 | 0.2521 | 0.0269  | 0.0063  | 0.7092 | 0.5170 |
| A549                          | 0.2340 | 0.2095 | 0.2428 | 0.0049  | 0.0054  | 0.7010 | 0.4619 |
